# Supplementary material for: The Small-Molecule Wnt Inhibitor ICG-001 Efficiently Inhibits Colorectal Cancer Stemness and Metastasis by Suppressing MEIS1 Expression
Source: MDPI journal article supplement (doi:10.3390/ijms222413413), 2021-12-14
Supplement: s1 [file s1]

Supplementary Materials for

**The small molecule Wnt inhibitor ICG-001 efficiently inhibits colorectal cancer stemness and metastasis by suppressing MEIS1 expression**

Jang-Hyun Choi<sup>1,\*</sup>, Tae-Young Jang<sup>1,\*</sup>, So-El Jeon<sup>1,\*</sup>, Jee-Heun Kim<sup>1</sup>, Choong-Jae Lee<sup>1</sup>, ,  
Hyeon-ji Yun<sup>1</sup>, Ji-Youn Jung<sup>2</sup>, So-Yeon Park<sup>1,3,†</sup>, Jeong-Seok Nam<sup>1,3,†</sup>

<sup>1</sup>School of Life Sciences, Gwangju Institute of Science and Technology, Gwangju, 61005, Republic of Korea

<sup>2</sup>Department of Companion and Laboratory Animal Science, Kongju National University, Yesan, Chungcheongnam 32439, Republic of Korea

<sup>3</sup>Cell Logistics Research Center, Gwangju Institute of Science and Technology, Gwangju, 61005, Republic of Korea

\* Equally contributed

† Correspondence: namje@gist.ac.kr (J.-S.N.); syepark0125@gist.ac.kr (S.-Y.P.); Tel.: +82-62-715-2893 (J.-S.N.)

## **1. Supplementary Materials and Methods**

### **1.1. Western blot analysis**

Protein isolation was conducted, as previously described [8]. The blot was probed with primary antibodies against LEF1 (#2230, Cell Signaling Technology, Boston, MA, USA), CTNNB1 (#9562, Cell Signaling Technology), and MEIS1 (ab229962, Abcam, Cambridge, UK). As a loading control, anti- $\beta$ -actin antibody (A5316, Sigma Aldrich, Saint Louis, MO, USA) was used. Subsequently, the blots were washed in TBST (10 mmol/l Tris-HCl, 50 mmol/l NaCl, and 0.25% Tween-20) and incubated using a horseradish peroxidase-conjugated secondary antibody. Target proteins were detected using enhanced chemiluminescence reagents (Thermo-Scientific, Waltham, MA, USA).

### **1.2. Sphere-forming assay**

Sphere-forming assay was performed, as previously described [5]. Briefly, cells were seeded in 6-well plates coated with poly-HEMA in serum-free media supplemented with EGF, FGF, B27, and heparin, and cultured for 7 days for sphere formation. The number of spheres from each replicate well was counted under an inverted microscope at 50 $\times$  magnification using the Image-Pro Premier 9.0 (Media Cybernetics, Rockville, MD, USA). Tumor sphere-forming efficiency (TSFE) was calculated as the number of spheres divided by the number of seeded cells.

### **1.3. Real-time reverse transcription-polymerase chain reaction (RT-qPCR)**

Total RNA was extracted using RNAiso (Takara, Shiga, Japan), and RNA purity was verified by measuring the 260/280 absorbance ratio. Using PrimeScript™ 1st Strand cDNA Synthesis Kit (Takara), the first strand cDNA was synthesized, and one-tenth of the cDNA was used for each PCR mixture containing Power SYBR® Green PCR Master Mix (Applied Biosystems, Foster City, CA, USA). RT-PCR was conducted

using a StepOnePlus Real-Time PCR System (Applied Biosystems). The PCR primer sequences are listed in Supplementary Table 1.

#### 1.4. Immunofluorescence assay

Immunofluorescence assay was conducted, as previously described [8]. Cells were seeded on poly-L-lysine and collagen I-coated cover glasses and fixed with 4% formalin. Tissue slides and cells were permeabilized using 0.3 M glycine and 0.3% Triton X-100, after which they were blocked with 2% normal swine serum (DAKO). As previously described, staining was conducted using primary anti-MEIS1 (1:200). All nuclei were counterstained with DAPI.

#### 1.5. Animal study

To examine the effect of ICG-001 on self-renewal ability of CRC cells, *in vivo* limiting dilution assay (LDA) was conducted as described in our previous report [9]. Briefly, HCT116 cells were subcutaneously injected into male NSG mice ( $1 \times 10^6$  cells/mouse). On the 7th day after inoculation, when tumor volume attained approximately 100 mm<sup>3</sup>, mice were randomly divided into two groups and treated daily with ICG-001 at 100 mg/kg or vehicle control (i.p., 4% ethanol, 8% Tween 80 in PBS, n = 5/group). On the 49th day, mice were sacrificed, and single tumor cells were isolated and injected into male NSG mice in various cellular numbers ( $1 \times 10^3$ ,  $1 \times 10^4$ ,  $1 \times 10^5$ , and  $1 \times 10^6$ /mouse, n = 5/each group) without any additional ICG-001 treatment. On the 70th day after inoculation, the incidence of tumor-bearing mice was determined by necropsy. The LDA plots and statistical significance were calculated using web-based software (<http://bioinf.wehi.edu.au/software/elda>).

To compare the self-renewal ability between wild-type and MEIS1-OE HCT116 cells, *in vivo* LDA was performed. Briefly, cells were subcutaneously injected into male

NSG mice in various cellular numbers ( $1 \times 10^3$ ,  $1 \times 10^4$ ,  $1 \times 10^5$ , and  $1 \times 10^6$ /mouse,  $n = 5$ /each group). On the 21st day after inoculation, the incidence of tumor-bearing mice was determined by necropsy. The LDA plots were generated as described above.

For the liver metastasis mouse model, HCT116-luc cells ( $1 \times 10^5$  cells/mouse) were inoculated into spleens of male NSG mice, followed by splenectomy, and surviving cells that grew in distant organs then contributed to the formation of liver metastasis. The extent of liver metastasis was monitored weekly via visualizing luciferase activity for 18 days using the IVIS Lumina Imaging System. After sacrifice, livers were removed, formalin-fixed, and paraffin-embedded to determine liver metastasis. To determine the effect of ICG-001 treatment on liver metastasis, male mice were randomly divided into two groups the next day after splenic injection of HCT116-luc cells ( $1 \times 10^6$  cells/mouse) and treated daily with ICG-001 (100 mg/kg) or vehicle control ( $n = 5$ /group) until necropsy. The extent of liver metastasis was monitored weekly via visualizing luciferase activity for 21 days as described above.

## 2. Supplementary Table

### 2.1. Supplementary Table S1: The list of PCR primer and siRNA sequences

| Primer & siRNA Sequence |         |                             |
|-------------------------|---------|-----------------------------|
| OCT1                    | Forward | CCCTGTCTCAGCCCATACAGA       |
|                         | Reverse | GCTGCAAATTGGTGGTTGGAT       |
| OCT4                    | Forward | CACCTTCCCTCCAACCAGTTGC      |
|                         | Reverse | GGGCTCTCCCATGCATTCAAAC      |
| SOX2                    | Forward | AAATGGGAGGGGTGCAAAAGAGGAG   |
|                         | Reverse | CAGCTGTCATTTGCTGTGGGTGATG   |
| SOX4                    | Forward | GGTCTCTAGTTCTTGCACGCTC      |
|                         | Reverse | CGGAATCGGCACTAAGGAG         |
| NANOG                   | Forward | TGGGATTACAGGCGTGAGCCAC      |
|                         | Reverse | AAGCAAAGCCTCCCAATCCCAAAC    |
| SOX9                    | Forward | CATGAGCGAGGTGCACTCC         |
|                         | Reverse | TCGCTTCAGGTCAGCCTTG         |
| CMYC                    | Forward | CAAGTATACGTGGCAATGCGT       |
|                         | Reverse | TCAAGAGTCCCAGGGAGAGT        |
| KLF4                    | Forward | ACGATCGTGGCCCCGAAAAGGACC    |
|                         | Reverse | CAACAACCGAAAATGCACCAGCCCCAG |
| LGR5                    | Forward | AATCCCCTGCCAGTCTC           |
|                         | Reverse | CCCTTGGAATGTATGTCAGA        |
| KLF5                    | Forward | CCCTTGACATACACAATGC         |
|                         | Reverse | GGATGGAGGTGGGGTTAAAT        |
| ALDH1A1                 | Forward | CTGGTTATGGGCCTACAGCA        |
|                         | Reverse | GCATTGTCCAAGTCGGCATC        |
| BMP4                    | Forward | GATCTTTACCGGCTTCAGTCTGGG    |
|                         | Reverse | ACCTCGTTCTCAGGGATGCTGC      |
| BAMBI                   | Forward | CGACAGACATCTGCCAAGCCAAAC    |
|                         | Reverse | GAAGTCAGCTCCTGCACCTTGGTG    |
| WNT1                    | Forward | CGGCGTTTATCTTCGCTATC        |
|                         | Reverse | TTCGATGGAACCTTCTGAGC        |
| WNT3A                   | Forward | TGTTGGGCCACAGTATTCCT        |
|                         | Reverse | GGGCATGATCTCCACGTAGT        |
| AXIN2                   | Forward | GAGACCCACCGTGTGAGC          |
|                         | Reverse | AACAGGTAAGCACCGTCTTGAT      |
| CTNNB1                  | Forward | CCTGTATGAGTGGGAACAGGG       |
|                         | Reverse | TCAGCCAAACGCTGGACATT        |
| LEF1                    | Forward | ACAGCGACCCGTACATGTCAA       |
|                         | Reverse | TGGACATGCCTTGCTTGGAGTT      |
| TCF4                    | Forward | GCCTTAGGGACGGACAAAGA        |
|                         | Reverse | CATAGTTCCTGGACGGGCTT        |

|        |           |                           |
|--------|-----------|---------------------------|
| CCND1  | Forward   | CTGTGCATCTACACCGACAAC     |
|        | Reverse   | CCTCCGCCTCTGGCATT         |
| APC    | Forward   | CTGGCAACATGACTGTCCTT      |
|        | Reverse   | TGCAAACCTCGCTTTGAAGAA     |
| CDH1   | Forward   | TTTGACGCCGAGAGCTACAC      |
|        | Reverse   | CACACCATCTGTGCCCCACTT     |
| FXVD5  | Forward   | TCCCACTGATGACACCACGA      |
|        | Reverse   | AAACCAGATGGCTTGAGGGT      |
| VEGFA  | Forward   | GGCCTCCGAAACCATGAACT      |
|        | Reverse   | GCAGTAGCTGCGCTGATAGA      |
| MMP2   | Forward   | CAATGGCAAGGAGTACAACAGC    |
|        | Reverse   | TGTCATAGGATGTGCCCTGG      |
| MMP7   | Forward   | GGCCATTCTTTGGGTATGGGA     |
|        | Reverse   | TGGATGTTCTGCCTGAAGTTT     |
| KRAS   | Forward   | TGGATATTCTCGACACAGCAGG    |
|        | Reverse   | GGACCATAGGTACATCTTCAGAGTC |
| IGF1   | Forward   | CCGCAGGATCCTTTGCTCTG      |
|        | Reverse   | TGCAAGGTGCAAATCACTCC      |
| CXCR4  | Forward   | GAACCCTGTTTCCGTGAAGA      |
|        | Reverse   | CTTGTCCGTCATGCTTCTCA      |
| CDKN2A | Forward   | CTGGACACGCTGGTGGTG        |
|        | Reverse   | AATCGGGGATGTCTGAGGGA      |
| CD44   | Forward   | CTACTGTACACCCCATCCCAG     |
|        | Reverse   | AGCCATTGTGTTGTTGTGTGA     |
| CD133  | Forward   | AGAAATGCACCAGCGACAGA      |
|        | Reverse   | TCAAGAGAGTTTCGCAAGTCC     |
| MEIS1  | Forward   | GTTGAAGTAGGAAGGGAGCCAG    |
|        | Reverse   | GCTGTGTGCGGGTACTGATG      |
| VIM    | Forward   | AACTTAGGGGCGCTCTTGTC      |
|        | Reverse   | CGCTGCTAGTTCTCAGTGCT      |
| CDH2   | Forward   | TGACCAGCCTCCAAGTGGTAT     |
|        | Reverse   | CAGGGGCTTTGTCACCGA        |
| SNAI1  | Forward   | CTGGGTGCCCTCAAGATGCA      |
|        | Reverse   | CCGGACATGGCCTTGTAGCA      |
| SNAI2  | Forward   | CACAGTGATGGGGCTGTATG      |
|        | Reverse   | GCCTCCAAAAGCCAACTA        |
| ZEB1   | Forward   | TGGTGATGCTGAAAGAGACG      |
|        | Reverse   | TGCACTGAGTGTGAAAAGC       |
| TJP1   | Forward   | GGAGAGGTGTTCCGTGTTGT      |
|        | Reverse   | GAGCGGACAAATCCTCTCTG      |
| L1CAM  | Forward   | CACTATGGCCTTGTCTGGGA      |
|        | Reverse   | ACATACTGTGGCGAAAGGGA      |
| siLEF1 | Sense     | GACGGUAAACUUGGUGCAU(dTdT) |
|        | Antisense | AUGCAGCCAAGUUACCGUC(dTdT) |

|                   |           |                           |
|-------------------|-----------|---------------------------|
| <b>siCTNNB1</b>   | Sense     | ACGACUAGUUCAGUUGCUU(dTdT) |
|                   | Antisense | AAGCAACUGAACUAGUCGU(dTdT) |
| <b>siMEIS1 #1</b> | Sense     | CAAAAAGCGUGGCAUCUUU(dTdT) |
|                   | Antisense | AAAGAUGCCACGCUUUUU(dTdT)  |
| <b>siMEIS1 #2</b> | Sense     | GACUCAGAAUACAUCCA(dTdT)   |
|                   | Antisense | UUGGAUGUAAUUCUGAGUC(dTdT) |
| <b>siMEIS1 #3</b> | Sense     | CUGACAUUCAGGCCCAAGU(dTdT) |
|                   | Antisense | ACUUGGGCCUGAAUGUCAG(dTdT) |
| <b>siMEIS1 #4</b> | Sense     | CUCUACCUAAAUAGUCGAU(dTdT) |
|                   | Antisense | AUCGACUAUUUAGGUAGAG(dTdT) |

### 3. Supplementary Figures



### 3.1. Supplementary Figure S1

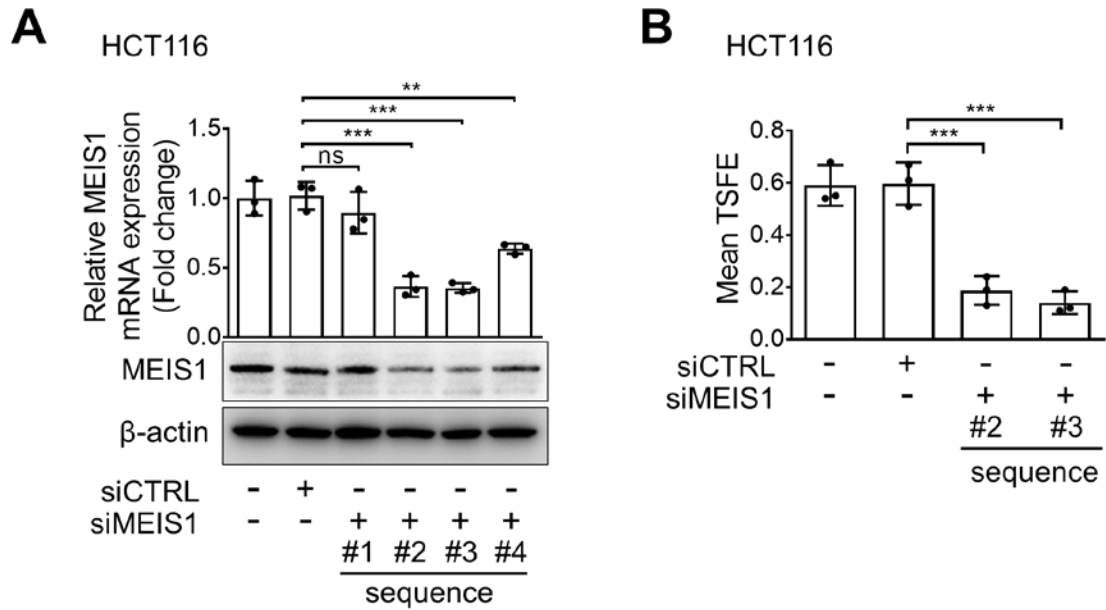

**Supplementary Figure S1. MEIS1-knockdown reduces self-renewal ability of CRC cells.** (A) RT-qPCR and Western blot analyses conducted 48 hours after MEIS1-knockdown (n = 3/group). (B) Sphere formation assay comparing self-renewal ability between MEIS1-knockdown and control cells (n = 3/group). Statistical differences were determined using one-way analysis of variance (ANOVA) with Dunnett's multiple comparisons test. \*\*, and \*\*\* indicate  $p < 0.01$ , and  $p < 0.001$ , respectively.

### 3.2. Supplementary Figure S2

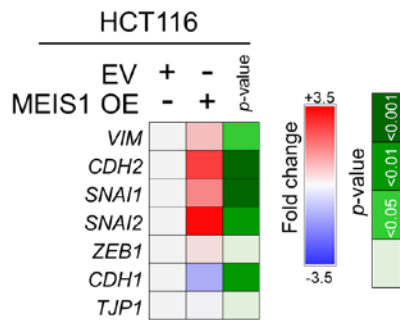

**Supplementary Figure S2. MEIS1-overexpression promotes the aggressive phenotype of CRC cells.**

RT-qPCR validation confirming the global increases in mesenchymal markers and reductions in epithelial markers by MEIS1-overexpression. The data are presented as a heatmap with fold changes and p-values. Statistical differences were determined using Student's t-test.
